# Supplementary material
Source: PubMed Central journal article supplement (PMC2475694)
Supplement: supp_M803190200_Supplementary_Material.pdf [file supp_M803190200_Supplementary_Material.pdf]

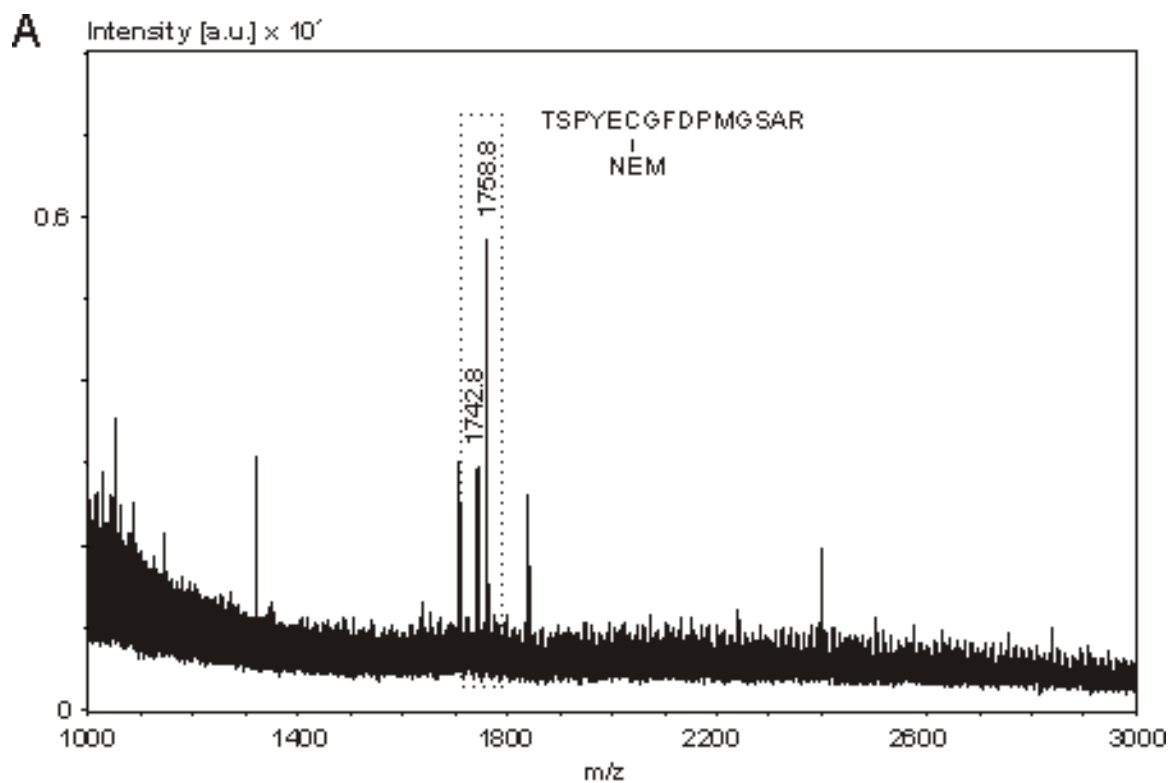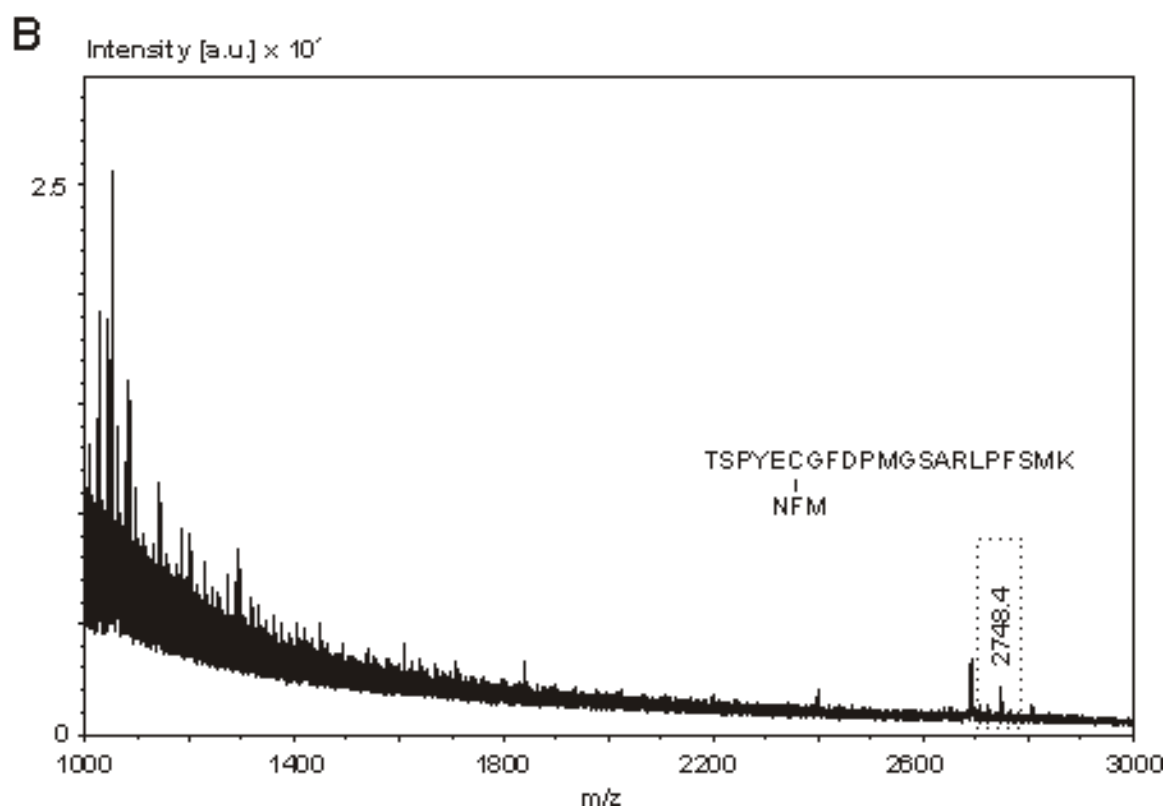

**Supplemental Figure S1:** MALDI MS of tryptic digests of two protein spots from dSDS-PAGE. (A) MS spectrum for NEM-labelled spot 2. (B) MS spectrum for NFM-labelled fluorescent spot 1. Signals that potentially correspond to tryptic NEM- and NFM-labelled fragments of the ND3 subunit of complex I were boxed (see also Supplementary Tables S1 and S2). [a.u.], counts in absolute units.

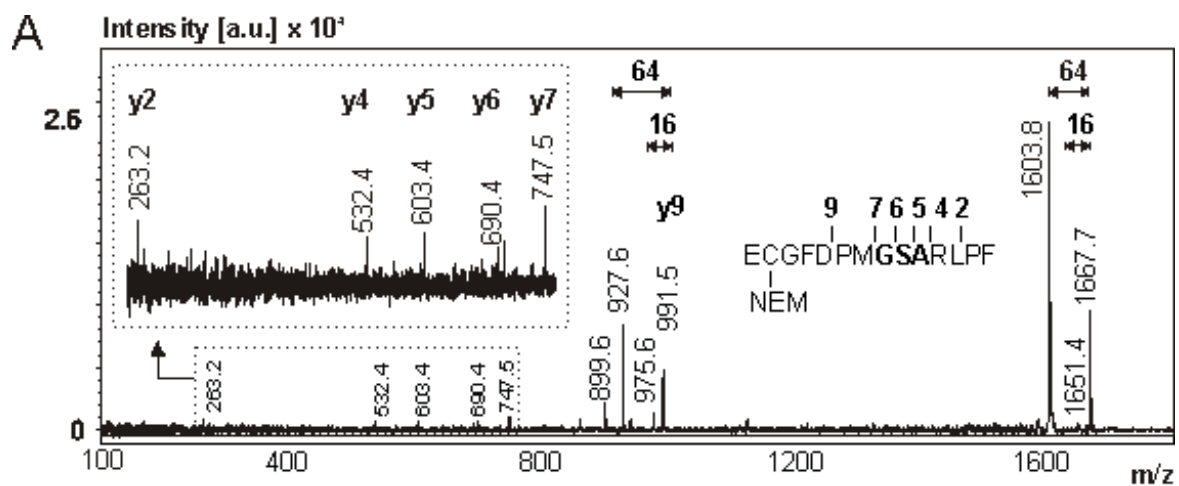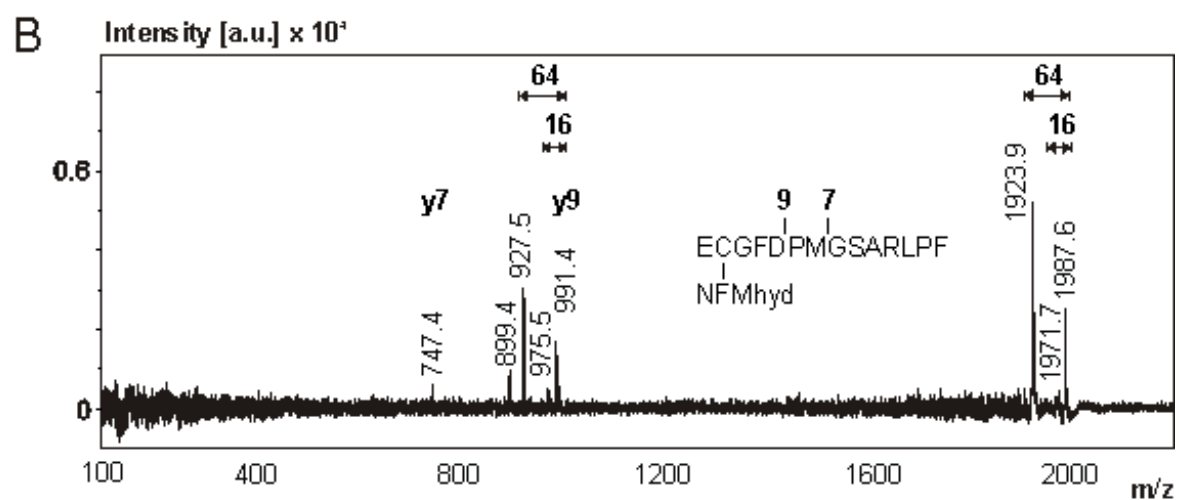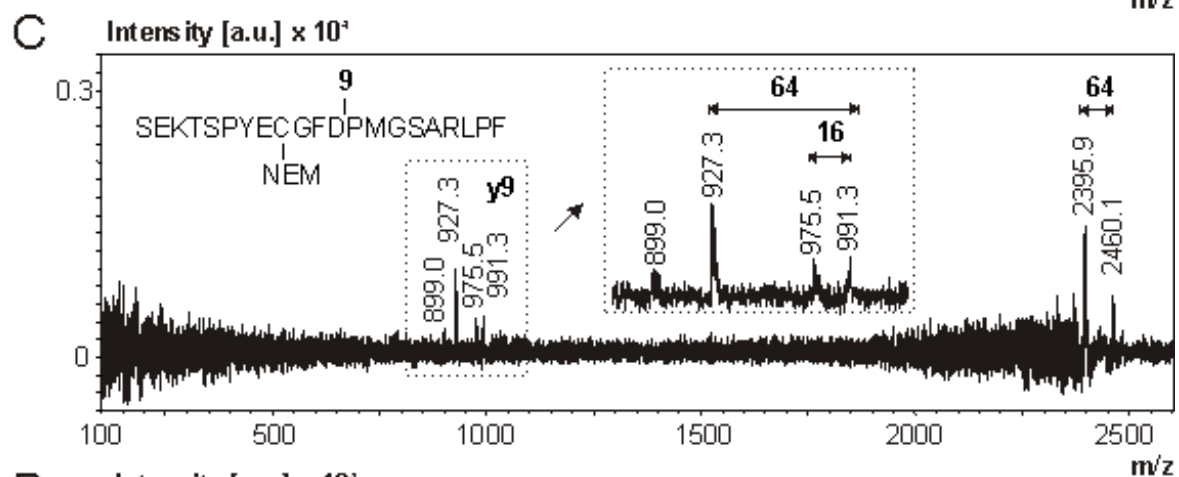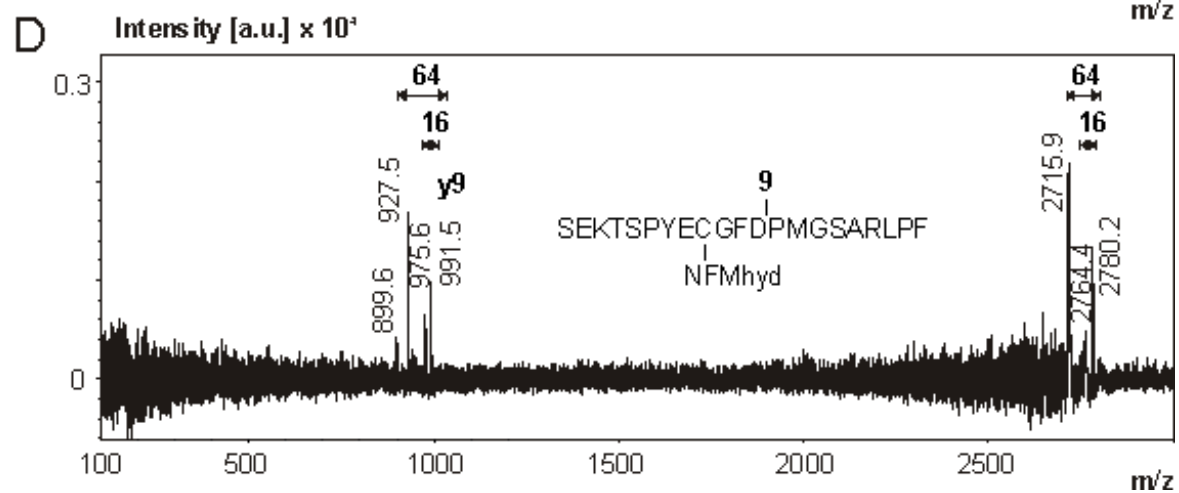

**Supplemental Figure S2:** *MS/MS analyses of ND3 fragments ECGFDPMGSARLPF and SEKTSPYECGFDPMG SARLPF.* A, The MS/MS spectrum of the NEM-labelled peptide ECGFDPMGSARLPF (1667.8 Da; see Fig. 3A, and spot 2, Fig. 2) revealed a short y-ion series (y4-y7) corresponding to the sequence tag GSA, and a very strong signal for the y9-ion (991.5 Da). The high intensity of the y9-ion is explained by the preferential cleavage of the aspartate-proline (D-P) bond (carboxy group of D bound to the amino group of P; ref. 4). Even the y9-ion of the non-oxidized peptide was detected as a satellite peak with a 16 Da mass shift (975.6 Da), since the precursor isolation window was wide enough to isolate not only the oxidized (1667.7 Da) but also a fraction of the non-modified form of the peptide (1651.4 Da). The loss of 64 Da that is characteristic for the loss of methanesulfenic acid (CH<sub>3</sub>SOH) was observed with the precursor and the y9-ion as well. Moreover, loss of CO at proline is visible (927.6 - 899.6 = 28 Da). MS/MS of the NEM-labelled 1667.8 Da fragment ECGFDPMGSARLPF. B, The MS/MS analysis of the NFMhyd-labelled peptide ECGFDPMGSARLPF (1987.8 Da; see Fig. 3B, and spot 1, Fig. 2) was very similar to the corresponding NEM-labelled peptide except for the absence of the y-ion series (y4-y7 in A). Only the y7-ion remained. C, Analysis of the 2460.1 Da NEM-labelled SEKTSPYECGFDPMG SARLPF fragment (see Fig. 3A, and spot 2, Fig. 2), and D, of the 2780.1 Da NFMhyd-labelled SEKTSPYECGFDPMG SARLPF fragment (see Fig. 3B, and spot 1, Fig. 2). NEM- and NFMhyd-labelled peptides SEKTSPYECGFDPMG SARLPF (2460.1 Da; C and 2780.2 Da, D) gave rise to the expected fragment profiles in the mass range 900–1,000 Da that were characteristic for methionine oxidation, preferred cleavage of the D-P bond, 64 Da loss from the precursors and a loss of CO at proline (m/z = 899). Zoomed areas are boxed. 64 Da-shifts due to loss of methanesulfenic acid, and 16 Da-shifts due to oxidation of methionine are marked by arrows. Fragmentation sites in the peptide sequences (bold numbers) correspond to fragment signals (y-ions marked bold).

**Supplementary Table S1. Tryptic digestion of fluorescent-labeled spot 1 (Fig. 2).**

One specific fragment fitted to the ND3 subunit of complex I providing the first hint for specific labelling of ND3. (see also Supplementary Figure S1B).

Abbreviations: m/z, measured mass ( $M_r+H$ );  $M_r$ , relative mass; Err., error given in ppm; C. and N., C-terminal and N-terminal amino acid positions, respectively, in the ND3 sequence; Mod., modifications; NEM, N-ethyl-maleimide; NEMhyd, N-ethyl-maleimide + H<sub>2</sub>O; NFM, N-fluoresceinyl-maleimide; NFMhyd, N-fluoresceinyl-maleimide + H<sub>2</sub>O;  $M_{ox}$ , oxidized methionine.

| m/z                                                                                                                                                                                                                                                                                                                                                                                                                        | $M_r$     | Err. | C. | N. | Sequence in ND3              | Mod. |
|----------------------------------------------------------------------------------------------------------------------------------------------------------------------------------------------------------------------------------------------------------------------------------------------------------------------------------------------------------------------------------------------------------------------------|-----------|------|----|----|------------------------------|------|
| 2748.4501                                                                                                                                                                                                                                                                                                                                                                                                                  | 2747.1018 | 124  | 34 | 54 | (K)TSPYECGFDPMG SARLPFSMK(F) | NFM  |
| <b>No match:</b> 1009.651; 1027.7653; 1044.1582; 1045.6443; 1047.1915; 1051.7556; 1061.9705; 1077.2697; 1077.6677; 1085.8128; 1097.6859; 1129.7062; 1143.8265; 1185.7615; 1201.8485; 1229.7765; 1273.7969; 1287.7975; 1294.7479; 1317.8293; 1320.7671; 1331.8157; 1333.8413; 1361.8423; 1375.8398; 1405.8680; 1419.8901; 1449.9165; 1609.9052; 1639.9889; 1670.0482; 1707.9589; 1839.0266; 2399.1535; 2691.4106; 2807.4559 |           |      |    |    |                              |      |

**Supplementary Table S2. Tryptic digestion of NEM-labeled spot 2 (Fig. 2).**

See also Supplementary Figure S1A. Abbreviations as in Table S1.

| m/z                                                                                                                                                | $M_r$     | Err.    | C. | N. | Sequence in ND3        | Mod.          |
|----------------------------------------------------------------------------------------------------------------------------------------------------|-----------|---------|----|----|------------------------|---------------|
| 1742.7791                                                                                                                                          | 1741.7076 | 36.8604 | 34 | 48 | (K)TSPYECGFDPMG SAR(L) | NEM           |
| 1758.766                                                                                                                                           | 1757.7025 | 31.9736 | 34 | 48 | (K)TSPYECGFDPMG SAR(L) | NEM; $M_{ox}$ |
| <b>No match:</b> 1045.6616; 1051.7504; 1143.8588; 1320.687; 1638.9633; 1705.2019; 1707.8535; 1839.0089; 2151.2277; 2241.3341; 2399.0768; 2501.4513 |           |         |    |    |                        |               |

**Supplementary Table S3. ND3-fragments from a chymotryptic digest of spot 1 (Fig. 2).**

The corresponding MS spectrum is shown in Fig. 3B. The mass list was cleared of data contained in the background list (Supplementary Table S5). Abbreviations as in Table S1.

| m/z       | $M_r$     | Err. | C. | N. | Sequence in ND3             | Mod.             |
|-----------|-----------|------|----|----|-----------------------------|------------------|
| 1243.3584 | 1242.3522 | -1   | 38 | 44 | (Y)ECGFDPM(G)               | NFMhyd           |
| 1259.3648 | 1258.3471 | 8    | 38 | 44 | (Y)ECGFDPM(G)               | NFMhyd, $M_{ox}$ |
| 1542.6733 | 1541.6643 | 1    | 38 | 51 | (Y)ECGFDPMG SARLP(S)        | $M_{ox}$         |
| 1795.9909 | 1794.9624 | 12   | 1  | 16 | (-)MNLMLALLTNFTLATL(L)      | $M_{ox}$         |
| 1971.7735 | 1970.7491 | 9    | 38 | 51 | (Y)ECGFDPMG SARLP(S)        | NFMhyd           |
| 1987.7813 | 1986.7441 | 15   | 38 | 51 | (Y)ECGFDPMG SARLP(S)        | NFMhyd, $M_{ox}$ |
| 2035.7455 | 2034.7176 | 10   | 31 | 44 | (Y)SEKTSPYECGFDPM(G)        | NFMhyd           |
| 2051.7458 | 2050.7125 | 13   | 31 | 44 | (Y)SEKTSPYECGFDPM(G)        | NFMhyd, $M_{ox}$ |
| 2074.8334 | 2073.7285 | 47   | 31 | 45 | (Y)SEKTSPYECGFDPMG(S)       | NFMhyd           |
| 2090.8423 | 2089.7234 | 53   | 31 | 45 | (Y)SEKTSPYECGFDPMG(S)       | NFMhyd, $M_{ox}$ |
| 2335.1403 | 2334.0297 | 44   | 31 | 51 | (Y)SEKTSPYECGFDPMG SARLP(S) | $M_{ox}$         |
| 2764.1407 | 2763.1145 | 7    | 31 | 51 | (Y)SEKTSPYECGFDPMG SARLP(S) | NFMhyd           |
| 2780.1419 | 2779.1094 | 9    | 31 | 51 | (Y)SEKTSPYECGFDPMG SARLP(S) | NFMhyd, $M_{ox}$ |

**No match:** 1143.731; 1166.6378; 1194.6027; 1345.6839; 1725.8839; 1729.9891; 1782.9599; 1928.0495; 1934.0537; 2038.0964; 2153.1961; 2271.1305; 2351.0956; 2726.1728; 2830.3149; 2868.2212; 2883.2035

**Supplementary Table S4. ND3-fragments from a chymotryptic digest of spot 2 (Fig. 2).** The corresponding MS spectrum is shown in Fig. 3A. The mass list was cleared of data contained in the background list (Supplementary Table S5). Abbreviations as in Table S1.

| m/z       | M <sub>r</sub> | Err. | C. | N. | Sequence                     | Mod.                       |
|-----------|----------------|------|----|----|------------------------------|----------------------------|
| 1027.7022 | 1026.6689      | 25   | 12 | 21 | (F)TLATLLVIA(F)              |                            |
| 1542.7046 | 1541.6643      | 21   | 38 | 51 | (Y)ECGFDPMG SARLPF(S)        | M <sub>ox</sub>            |
| 1597.8147 | 1596.8255      | -11  | 1  | 14 | (-)MNLMLALLTNFTLA(T)         | M <sub>ox</sub>            |
| 1651.7596 | 1650.7170      | 21   | 38 | 51 | (Y)ECGFDPMG SARLPF(S)        | NEM                        |
| 1667.7568 | 1666.7120      | 23   | 38 | 51 | (Y)ECGFDPMG SARLPF(S)        | NEM; M <sub>ox</sub>       |
| 1685.7646 | 1684.7225      | 21   | 38 | 51 | (Y)ECGFDPMG SARLPF(S)        | NEMhyd;<br>M <sub>ox</sub> |
| 1796.0232 | 1794.9624      | 30   | 1  | 16 | (-)MNLMLALLTNFTLATL(L)       | M <sub>ox</sub>            |
| 2335.2008 | 2334.0297      | 70   | 31 | 51 | (Y)SEKTSPYECGFDPMG SARLPF(S) | M <sub>ox</sub>            |
| 2444.1606 | 2443.0824      | 29   | 31 | 51 | (Y)SEKTSPYECGFDPMG SARLPF(S) | NEM                        |
| 2460.1416 | 2459.0773      | 23   | 31 | 51 | (Y)SEKTSPYECGFDPMG SARLPF(S) | NEM; M <sub>ox</sub>       |
| 2478.1457 | 2477.0879      | 20   | 31 | 51 | (Y)SEKTSPYECGFDPMG SARLPF(S) | NEMhyd;<br>M <sub>ox</sub> |

**No match:** 1022.5757; 1044.1007; 1047.0783; 1062.029; 1064.0815; 1077.2229; 1085.7685; 1120.6273; 1143.7771; 1194.6167; 1322.7055; 1343.7761; 1527.7754; 1603.8022; 1619.8261; 1884.0461; 2054.1206; 2222.1893; 2406.2667

**Supplementary Table S5. Background list (m/z = 1000 – 3000) for chymotryptic digests.**

m/z  
1059.5872; 1060.0773; 1061.5947; 1129.6390; 1143.7310; 1166.6378; 1177.6390;  
1194.6027; 1209.6682; 1243.3584; 1259.3648; 1259.8154; 1345.6839; 1523.8301;  
1539.8396; 1542.6733; 1598.9045; 1610.8536; 1626.8992; 1637.8849; 1670.9239;  
1720.9239; 1725.8839; 1729.9891; 1733.0093; 1738.9344; 1779.0036; 1782.9599;  
1792.9911; 1795.9909; 1855.0351; 1883.0226; 1928.0495; 1934.0537; 1971.7735;  
1987.7813; 1991.7713; 2035.1099; 2035.7455; 2038.0964; 2051.7458; 2074.8334;  
2090.8423; 2093.8497; 2136.1807; 2153.1961; 2227.0110; 2271.1305; 2335.1403;  
2351.0956; 2726.1728; 2764.1407; 2780.1419; 2830.3149; 2868.2212; 2883.2035;  
2993.4247

**Supplementary Table S6. ND3 fragments of spot 1 (Fig. 2) digested by elastase (for MS spectrum see Fig. 5A).** The mass list was cleared for components contained in the background list (Supplementary Table S7). Reliable assignment of signals was achieved by MS/MS-experiments (Fig. 5B). Abbreviations as in Table S1.

| m/z       | M <sub>r</sub> | Err. | C. | N. | Sequence          | Mod.                    |
|-----------|----------------|------|----|----|-------------------|-------------------------|
| 1734.5677 | 1733.5538      | 4    | 35 | 46 | (T)SPYECGFDPMG(S) | NFMhyd                  |
| 1750.5804 | 1749.5487      | 14   | 35 | 46 | (T)SPYECGFDPMG(S) | NFMhyd; M <sub>ox</sub> |

**No match:** 1080.6191; 1094.6219; 1129.6544; 1171.6548; 1438.7811; 1508.7600; 1528.8344; 1622.8436; 1763.9252; 1877.0582; 1910.0329; 2005.0401; 2130.1235; 2193.2439; 2252.1688; 2331.2375; 2361.2715; 2808.2668

**Supplementary Table S7. Background list (m/z = 1000 – 3000) for digestion by elastase.**

**m/z**

1027.6970; 1061.5974; 1064.5990; 1085.7658; 1111.6287; 1113.6275; 1135.6301;  
1143.7608; 1169.6769; 1176.6304; 1201.8137; 1286.7188; 1292.7480; 1392.7745;  
1415.7141; 1418.7596; 1483.8189; 1503.8062; 1539.8404; 1587.8939; 1639.9245;  
1650.8855; 1802.0314; 1841.9235; 1879.9718; 1948.0481; 1986.1529; 2020.9986;  
2166.0938; 2326.1894
